# Supplementary material for: The electrostatic confinement of aquated monocationic Gd(iii) complex-molecules within the inner core of porous silica nanoparticles creates a highly efficient T1 contrast agent for magnetic resonance imaging
Source: Royal Society of Chemistry journal article supplement (doi:10.1039/d2dt02272a), 2022-01-01
Supplement: d2dt02272a1.pdf [file d2dt02272a1.pdf]

# **Electrostatic Confinement of Aquated Monocationic Gd(III) Complex-Molecules within the Inner Core of Porous Silica Nanoparticles Endows a Highly Efficient T<sub>1</sub> Contrast Agent for Magnetic Resonance Imaging**

Riya Mallik,<sup>‡a</sup> Mahmuda Khannam,<sup>‡a</sup> Muktashree Saha,<sup>b</sup> Shivani Marandi,<sup>c</sup>  
Sachin Kumar,<sup>b</sup> Chandan Mukherjee<sup>a\*</sup>

\*Corresponding address:

Dr. Chandan Mukherjee, Department of Chemistry, Indian Institute of Technology Guwahati,  
Guwahati, 781039, Assam, India

Email: cmukherjee@iitg.ac.in

Phone No. +91-361-258-2327

Fax: +91-361-258-2349

| <b>Contents</b>                                                                                                                                                                                  | <b>Page</b> |
|--------------------------------------------------------------------------------------------------------------------------------------------------------------------------------------------------|-------------|
| Excitation and emission spectra of complex 2 in H <sub>2</sub> O, and in D <sub>2</sub> O                                                                                                        | S3          |
| UV-Vis spectral changes during competitive study for determining pGd value for ligand H <sub>2</sub> hbda (where, L = H <sub>2</sub> hbda) against DTPA                                          | S3          |
| Energy dispersive X-ray (EDS) analysis of complex 1@SiO <sub>2</sub> NPs                                                                                                                         | S4          |
| FTIR spectrum of complex 1, complex 1@SiO <sub>2</sub> NP, pristine SiO <sub>2</sub> NPs and complex 1@SiO <sub>2</sub> NP in presence of D <sub>2</sub> O.                                      | S4-S5       |
| Nitrogen adsorption-desorption isotherm and pore size distribution blank SiO <sub>2</sub> NP and complex 1@SiO <sub>2</sub> NPs.                                                                 | S5          |
| (1/T <sub>1</sub> ) versus [Gd(III)] for complex 1@SiO <sub>2</sub> NPs, recorded at 25 °C, 37 °C and in presence of 4.5% (w/v) BSA                                                              | S6          |
| Morphological characterization at pH 7.4 and zeta potentials of hollow porous blank SiO <sub>2</sub> measured in the pH range 2 to 10                                                            | S6-S7       |
| DLS hydrodynamic diameters, zeta potentials, relaxivity values of complex 1@SiO <sub>2</sub> NPs in absence and presence of BSA                                                                  | S7-S8       |
| TGA analysis spectra for complex 1@SiO <sub>2</sub> NP in absence and presence of BSA                                                                                                            | S8          |
| r <sub>1</sub> value of complex 1@SiO <sub>2</sub> with increasing concentration of BSA                                                                                                          | S9          |
| Luminescence lifetime decay curves of complex 2 at pH 10 and 4                                                                                                                                   | S9-S10      |
| UV-Vis spectra of complex 1 at pH ~ 7.4, and 4.0                                                                                                                                                 | S10         |
| X-band EPR spectra of complex 1 at pH ~ 2.1, and 7.4                                                                                                                                             | S11         |
| Optimized structure of complex 1                                                                                                                                                                 | S11         |
| Time profile of transmetallation of complex 1 with Zn(II)                                                                                                                                        | S12         |
| Hydrodynamic diameter of complex 1@SiO <sub>2</sub> NPs in absence and presence of equivalent amount of ZnCl <sub>2</sub>                                                                        | S12         |
| Relative image intensity plot for MR-images of complex 1@SiO <sub>2</sub> NPs using <i>ImageJ</i> software.                                                                                      | S13         |
| Particle size distribution of complex 1@SiO <sub>2</sub> NPs that was internalized inside HeLa cell after 48 hours                                                                               | S13         |
| Fluorescence microscopy images of untreated and treated HeLa cells                                                                                                                               | S14         |
| <sup>1</sup> H, <sup>13</sup> C-NMR, IR, and mass spectra of ligand H <sub>2</sub> hbda                                                                                                          | S14-S16     |
| IR ,mass spectra and Job's plot of complex 1                                                                                                                                                     | S16-S17     |
| UV-Vis spectral changes of xylenol orange in presence of varied concentrations Gd(III) ion and simultaneous calibration curve                                                                    | S18         |
| IR and mass spectra of complex 2                                                                                                                                                                 | S19         |
| Competition titration with DTPA                                                                                                                                                                  | S19         |
| Number of complex per nanoparticle of complex 1@SiO <sub>2</sub> NPs                                                                                                                             | S20         |
| Computational details                                                                                                                                                                            | S21         |
| Textural properties of SiO <sub>2</sub> and complex 1@SiO <sub>2</sub> NPs                                                                                                                       | S21         |
| Reproducibility of relaxivity data of complex 1@SiO <sub>2</sub> NPs (per Gd)                                                                                                                    | S21         |
| Relaxivty comparison table                                                                                                                                                                       | S22         |
| TEM diameter, hydrodynamic diameter, zeta potential, and simulatenous r <sub>1</sub> values of bare silica np, complex 1@SiO <sub>2</sub> NPs in absence and presence of BSA and at different pH | S23         |
| Optimized coordinates                                                                                                                                                                            | S24-S26     |

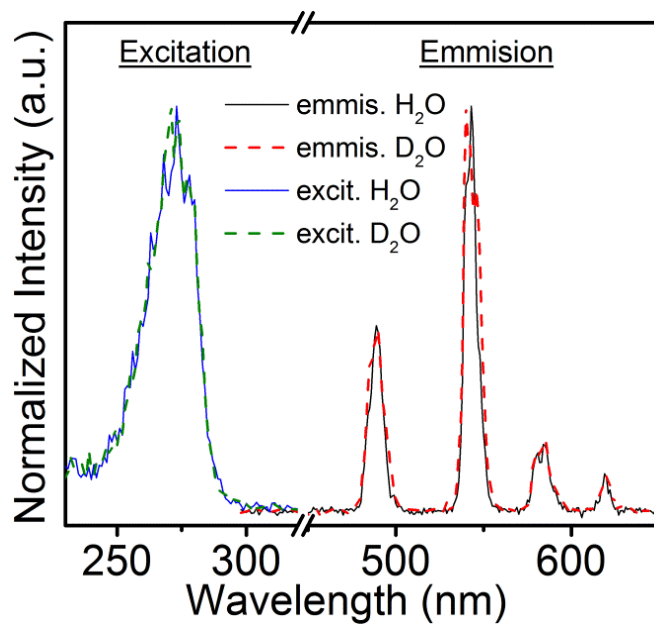

**Figure S1.** Excitation and emission spectra of complex **2** in H<sub>2</sub>O, and in D<sub>2</sub>O (0.5 mM, 25 °C).

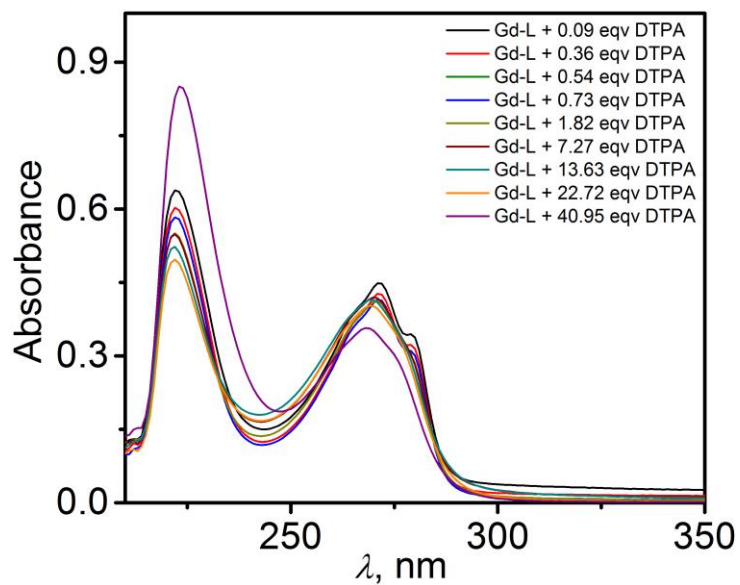

**Figure S2.** UV-Vis spectral changes during competitive study for determining pGd value for ligand H<sub>2</sub>hbda (where, L = H<sub>2</sub>hbda) against DTPA.

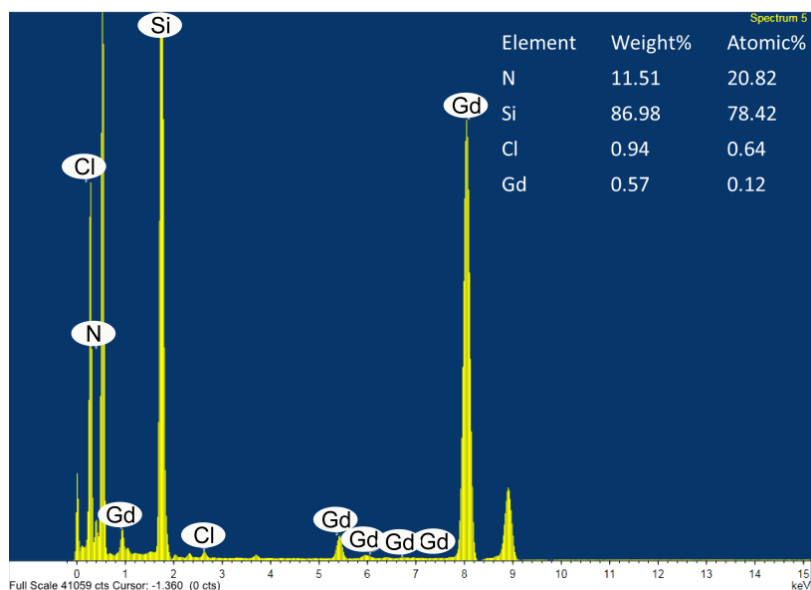

**Figure S3.** Energy dispersive X-ray (EDS) analysis of complex 1@SiO<sub>2</sub>NPs showing existence of Gd, Si, N and Cl elements in the isolated nanoparticles.

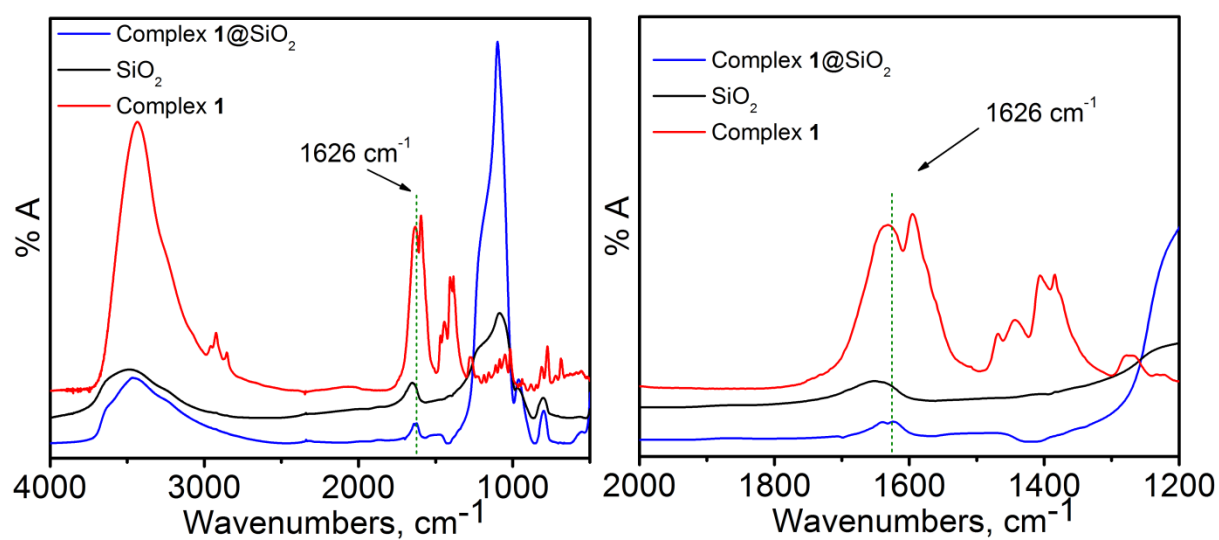

**Figure S4.** FTIR spectrum of complex 1, complex 1@SiO<sub>2</sub>NP and SiO<sub>2</sub> NPs.

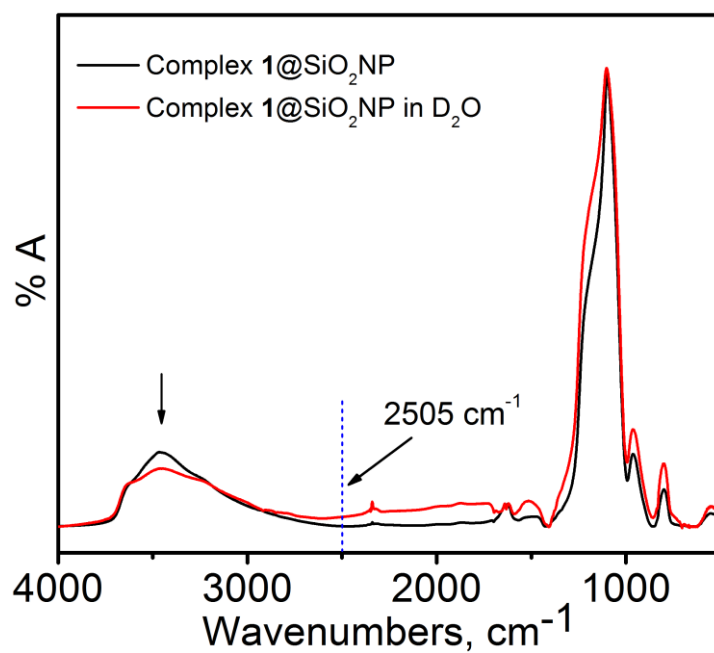

**Figure S5.** FTIR spectrum of complex **1**@SiO<sub>2</sub>NP and complex **1**@SiO<sub>2</sub>NP<sub>D<sub>2</sub>O</sub>. Normalized with respect to 1100 cm<sup>-1</sup> band.

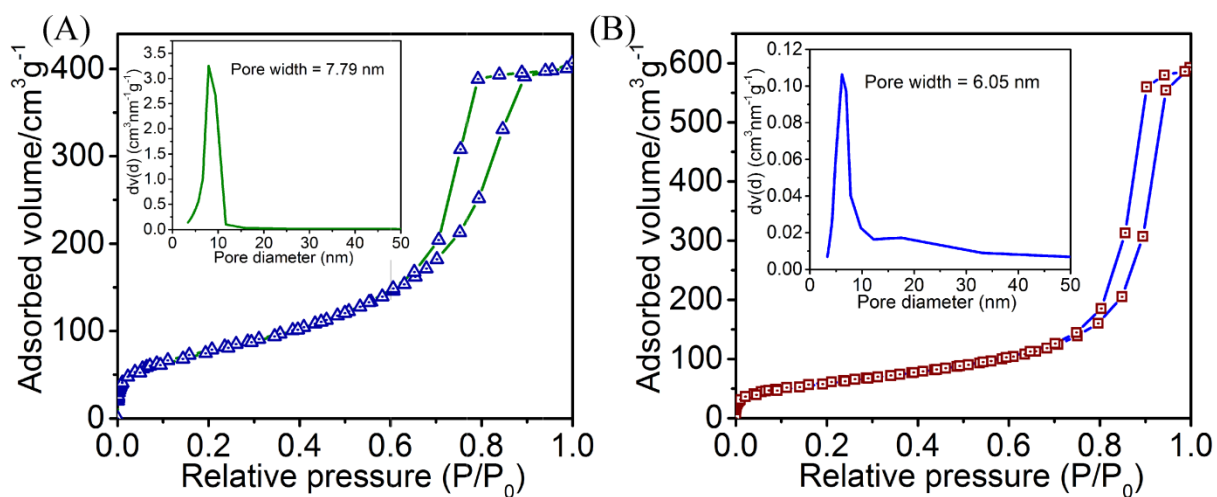

**Figure S6.** Nitrogen adsorption-desorption isotherm and pore size distribution (inset) of (A) pristine SiO<sub>2</sub>NP, and (B) complex **1**@SiO<sub>2</sub>NPs.

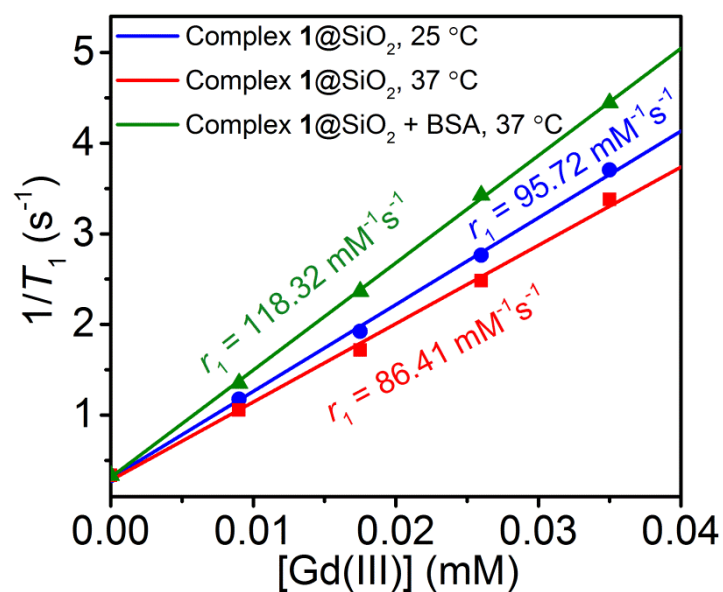

**Figure S7.** ( $1/T_1$ ) versus [Gd(III)] for complex **1**@SiO<sub>2</sub>NPs, recorded at 25 °C, 37 °C and in the presence of 4.5% (w/v) BSA. Measurements were done at pH ~ 7.4, and 1.41 T.

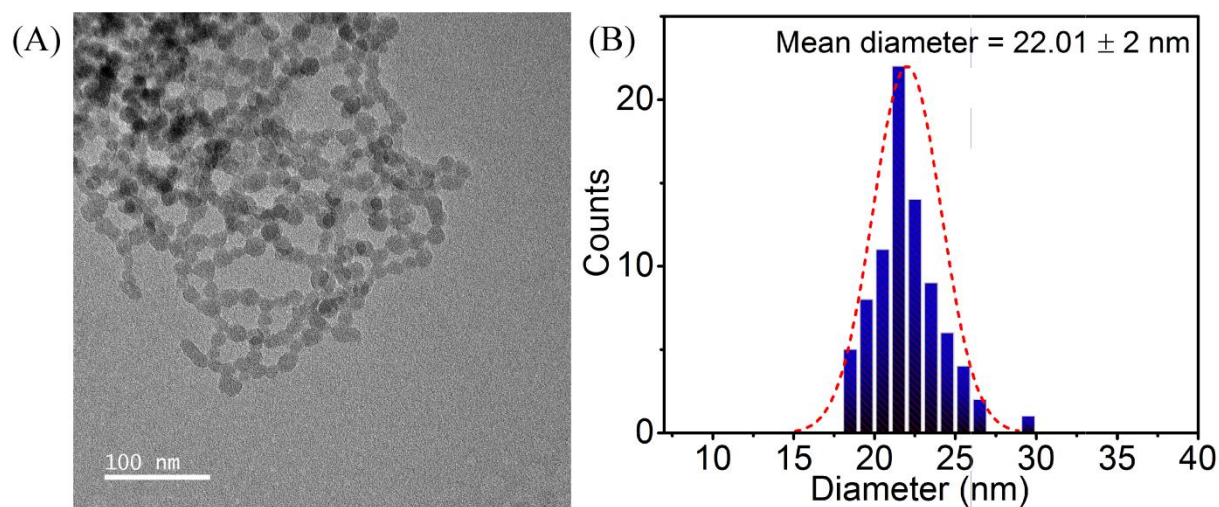

**Figure S8.** Morphological characterization of pristine SiO<sub>2</sub> nanoparticles (in the absence of complex **1**). (A) Representative TEM image and (B) corresponding particle size distribution plot.

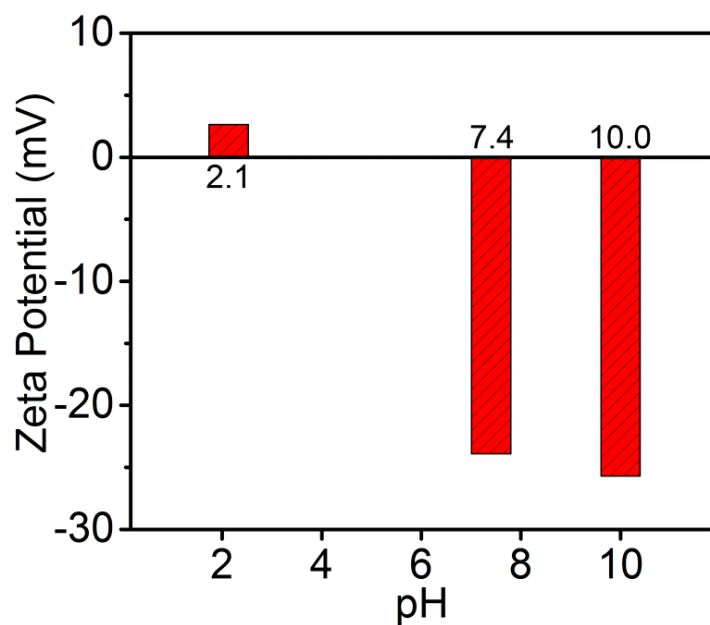

**Figure S9.** Zeta potentials of hollow porous pristine silica nanoparticles (in the absence of complex **1**) measured in the pH range 2 to 10.

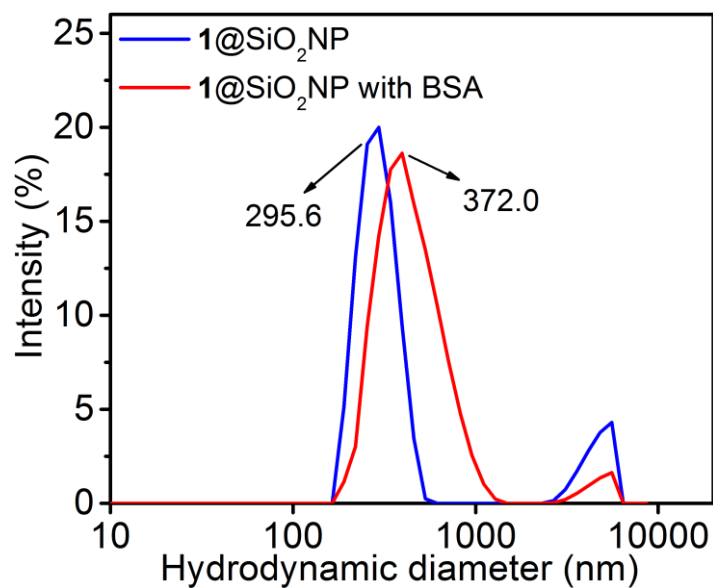

**Figure S10.** DLS hydrodynamic diameters of complex **1**@SiO<sub>2</sub>NPs in the absence and the presence of BSA (4.5% w/v) at pH 7.4.

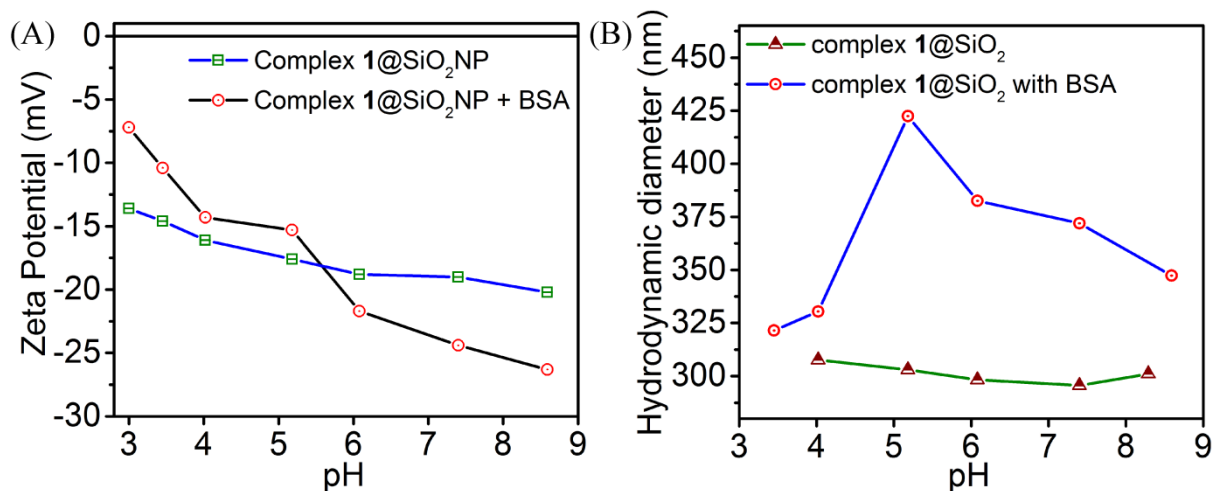

**Figure S11:** (A) Zeta potentials of complex 1@SiO<sub>2</sub>NP recorded in absence and presence of 4.5% (w/v) BSA at different pH. (B) Hydrodynamic diameter of complex 1@SiO<sub>2</sub>NP in absence and presence of 4.5% (w/v) BSA at different pH.

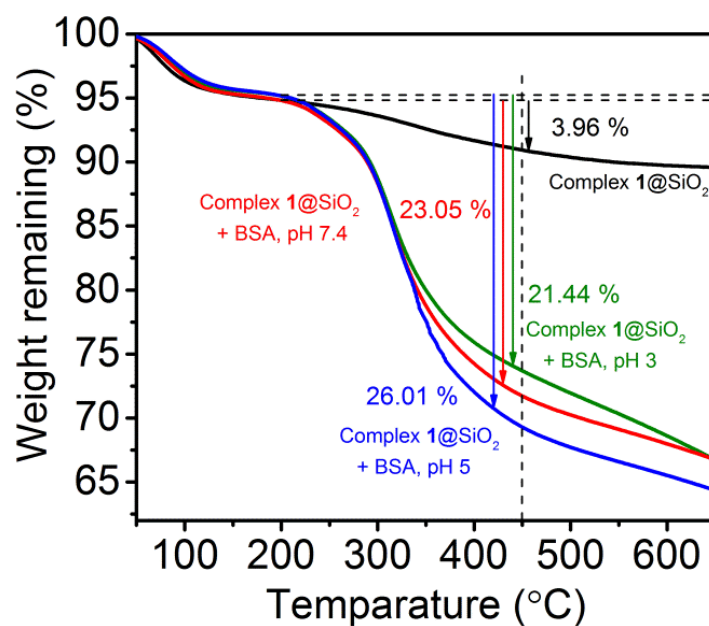

**Figure S12:** TGA analysis spectra for complex 1@SiO<sub>2</sub>NP (black line), in the presence of 4.5% (w/v) BSA at pH 3 (green line), pH 5 (blue line), and pH 7.4 (red line).



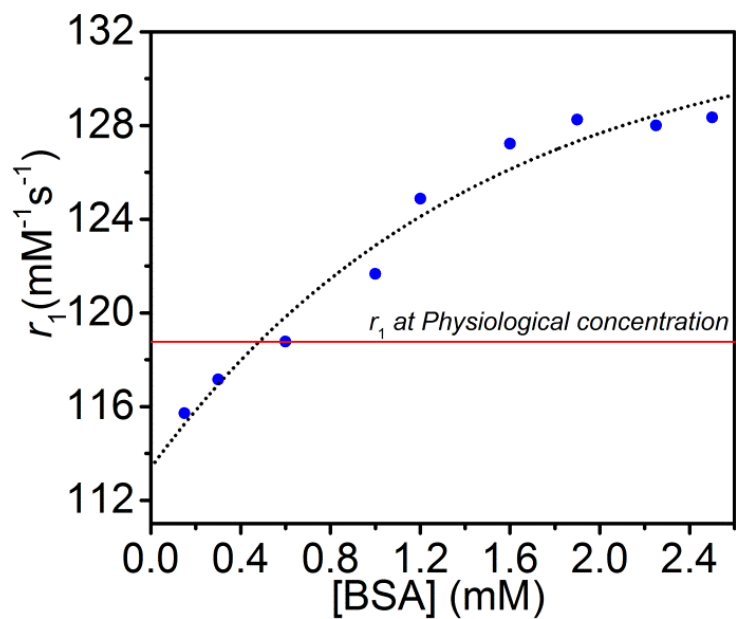

**Figure S13:**  $r_1$  values for complex **1**@SiO<sub>2</sub> measured in presence of increasing concentration of BSA, at 37 °C, pH 7.4, and 1.41 T.

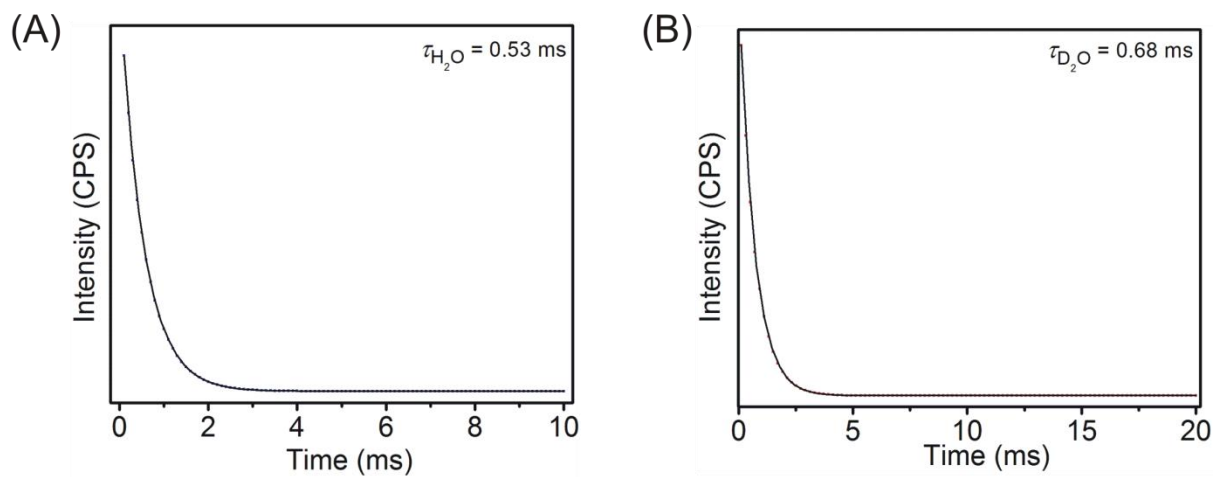

**Figure S14.** Luminescence lifetime decay curves of complex **2** in (A) H<sub>2</sub>O, and (B) D<sub>2</sub>O at pH ~ 10.0.

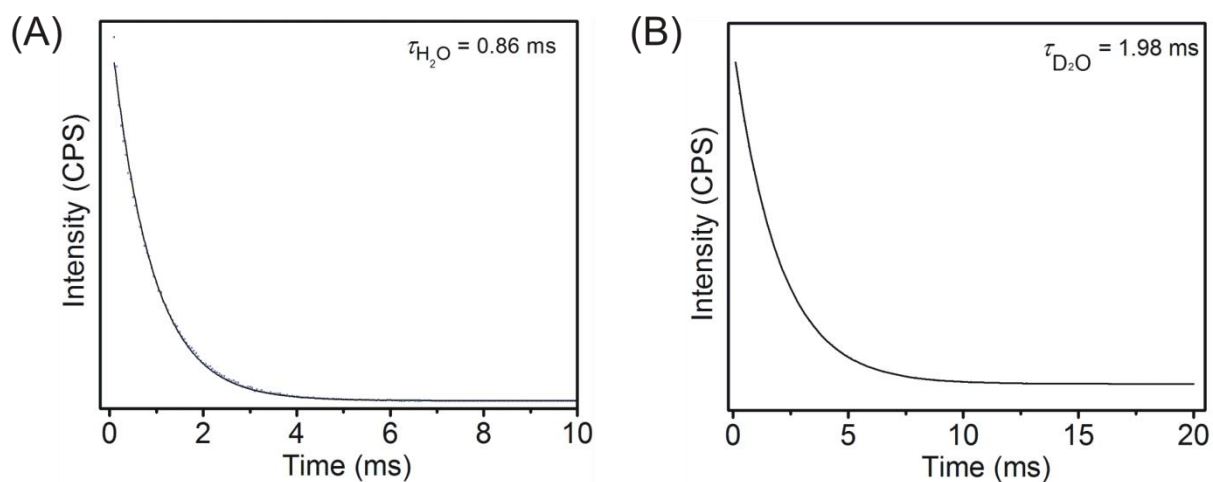

**Figure S15.** Luminescence lifetime decay curves of complex **2** in (A) H<sub>2</sub>O, and (B) D<sub>2</sub>O at pH  $\sim$  4.0.

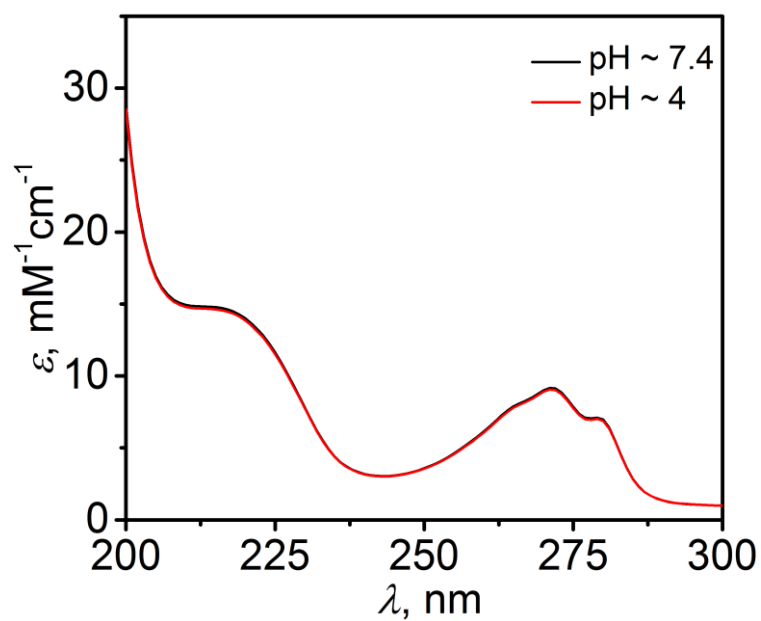

**Figure S16.** UV-Vis spectra of complex **1** at pH  $\sim$  7.4, and 4.0.

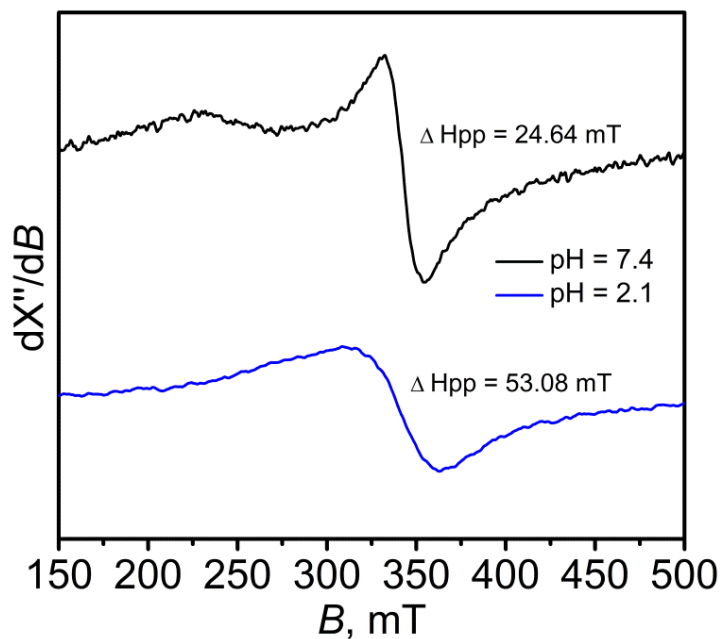

**Figure S17.** X-band EPR spectra of complex **1** at pH  $\sim$  2.1, and 7.4; measured at room temperature, power = 0.995 mW, modulation frequency = 100 kHz, and amplitude = 10 G.

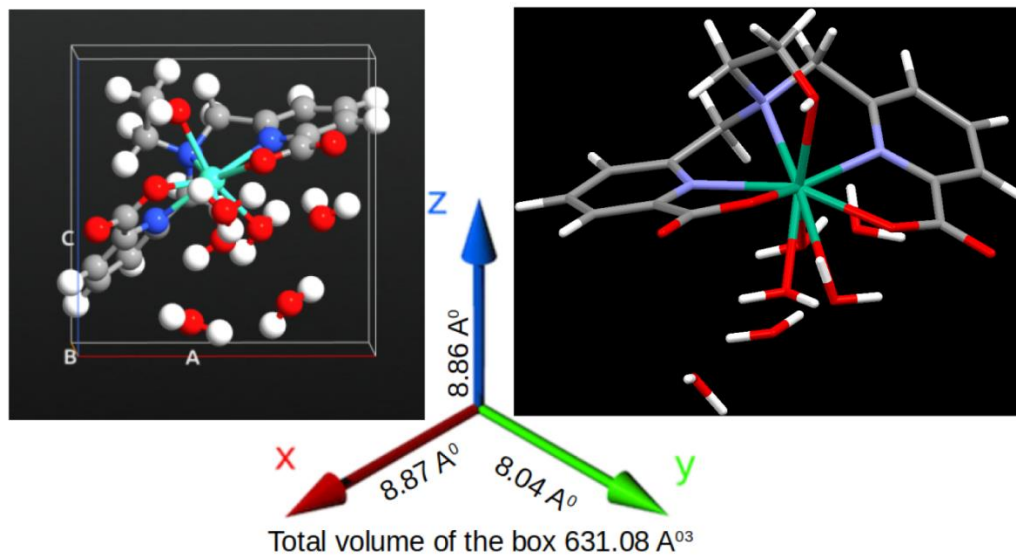

**Figure S18.** Optimized structure of tris(aquated) complex **1**. Optimized at B97D3 level containing a pure functional, B97. Red = oxygen, blue = nitrogen, grey = carbon, green = gadolinium, and white = hydrogen. According to the calculations the molecule could be fitted within a cavity having an estimated volume of 631.08 Å<sup>3</sup> (i.e. 8.87Å<sup>o</sup>×8.04Å<sup>o</sup>×8.86Å<sup>o</sup>).

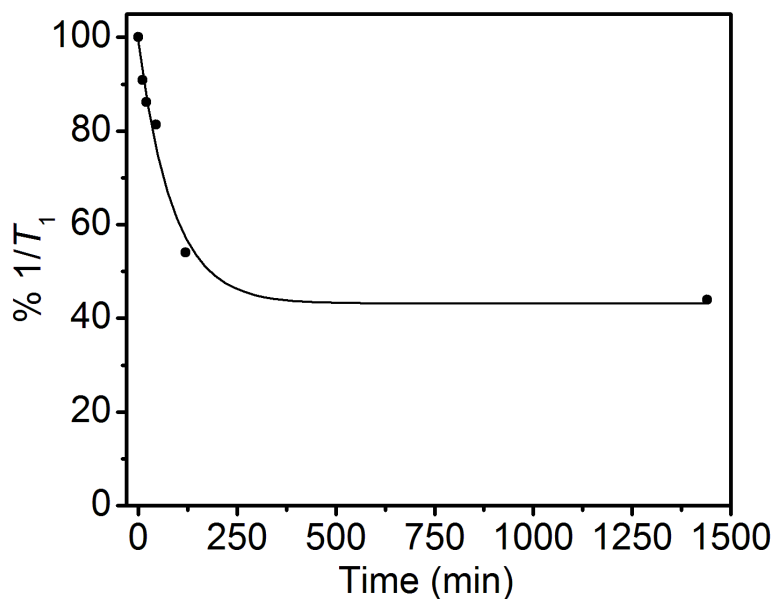

**Figure S19.** Time profile of transmetallation of  $[\text{Gd}(\text{hbda})(\text{H}_2\text{O})_3]^+$  (complex **1**) with 1 equivalent of  $\text{Zn}(\text{II})$  ion. It is monitored by measuring  $T_1$  time as liberated  $\text{Gd}(\text{III})$  ion precipitates as  $\text{GdPO}_4$ , which does not make contribution to  $T_1$ . The  $T_1$  relaxation times were measured by adding 2.5 mM  $\text{ZnCl}_2$  to 2.5 mM complex **1** in 50 mM phosphate buffer at 37 °C.

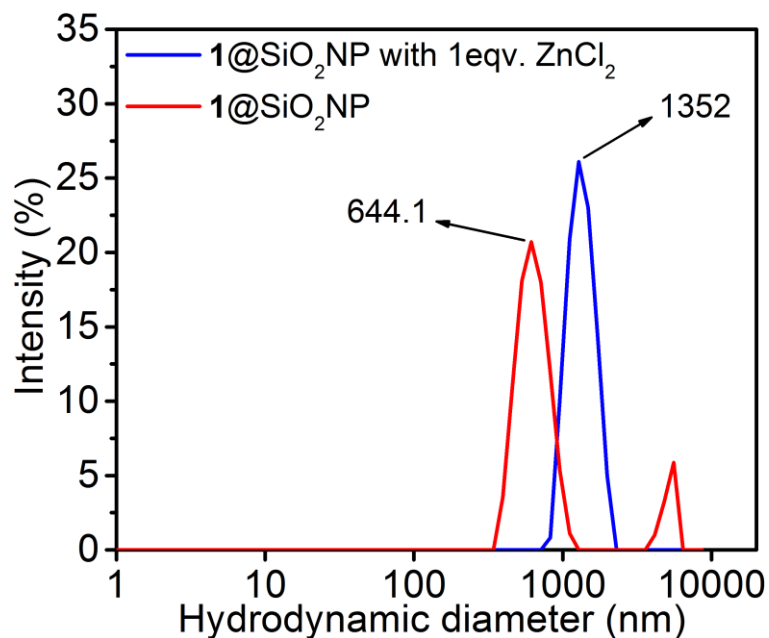

**Figure S20.** Hydrodynamic diameter of complex **1**@SiO<sub>2</sub>NPs in the absence and the presence of equivalent amount of  $\text{ZnCl}_2$ , measured in phosphate buffer, at pH ~ 7.0.

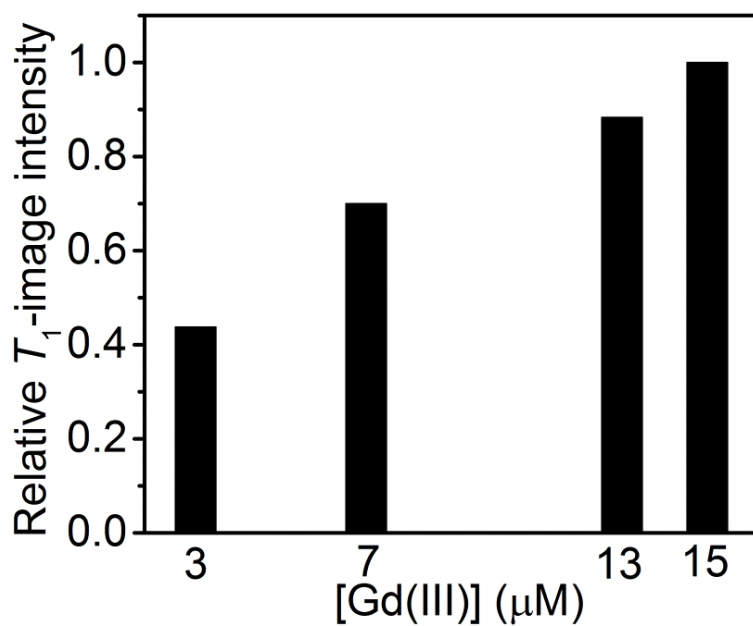

**Figure S21.** Relative image intensity plot for MR-images of complex **1**@SiO<sub>2</sub>NPs using *ImageJ* software.

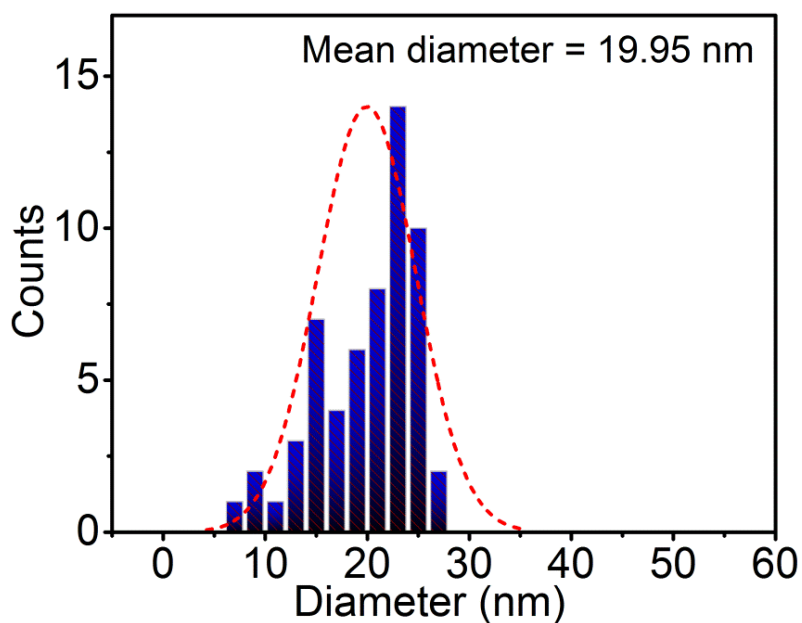

**Figure S22.** Particle size distribution of complex **1**@SiO<sub>2</sub>NPs that was internalized inside HeLa cell after 48 hours.

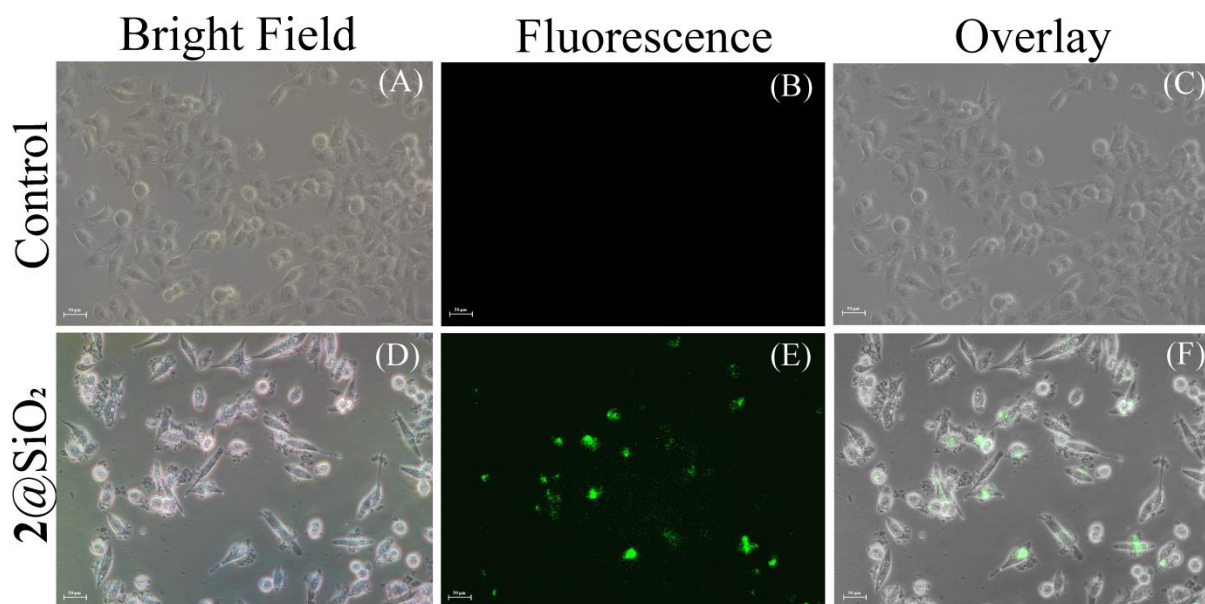

**Figure S23:** Fluorescence microscopy images of HeLa cells (A)-(C): untreated; (D)-(F): treated with complex  $2@SiO_2$  *i.e.*, Tb(III)-congener. Cellular uptake was visualized by treating HeLa cells with  $100 \mu M$  of complex  $2@SiO_2$  for 24 h. Cells were subsequently fixed with 4% formaldehyde solution for 15 mins, thoroughly washed with PBS and then observed under Fluorescence inverted microscope *Nikon ECLIPSE Ti-U*.

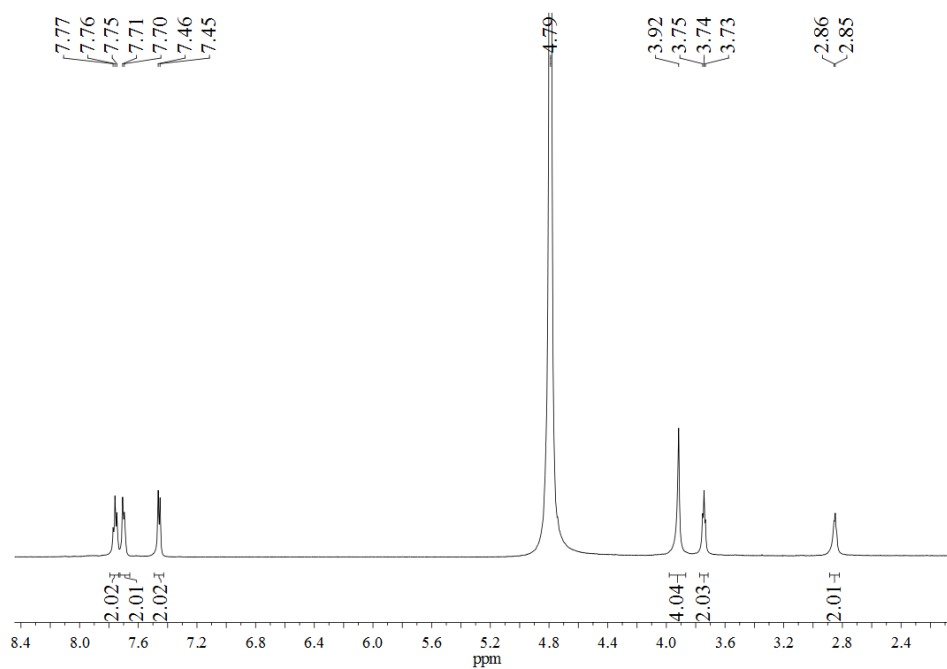

**Figure S24.**  $^1H$ -NMR spectrum of ligand  $H_2hbda \cdot HCl$  in  $D_2O$  solvent.

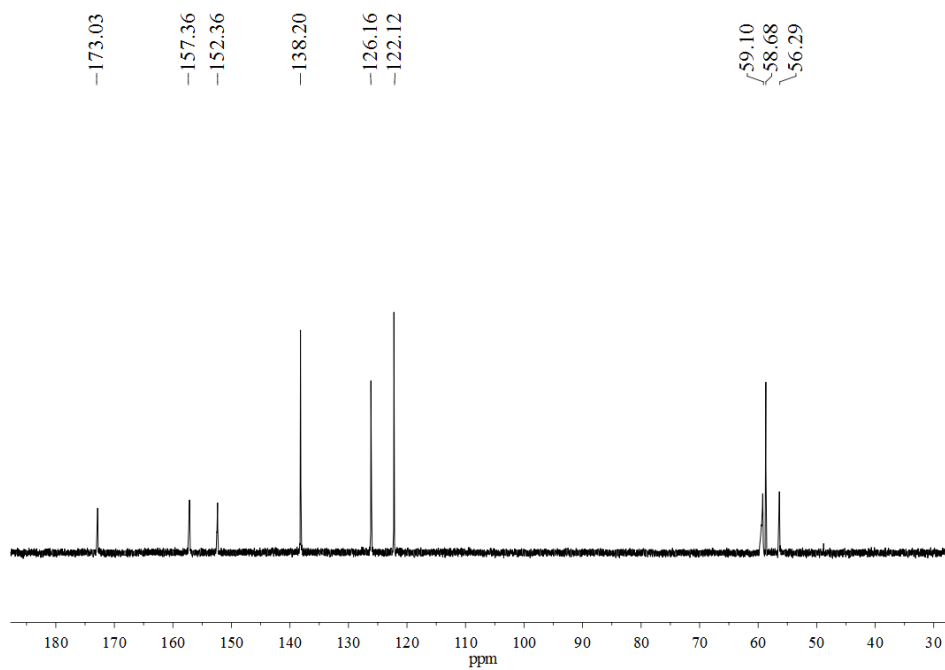

**Figure S25.**  $^{13}\text{C}$ -NMR spectrum of ligand  $\text{H}_2\text{hbda}\cdot\text{HCl}$  in  $\text{D}_2\text{O}$  solvent.

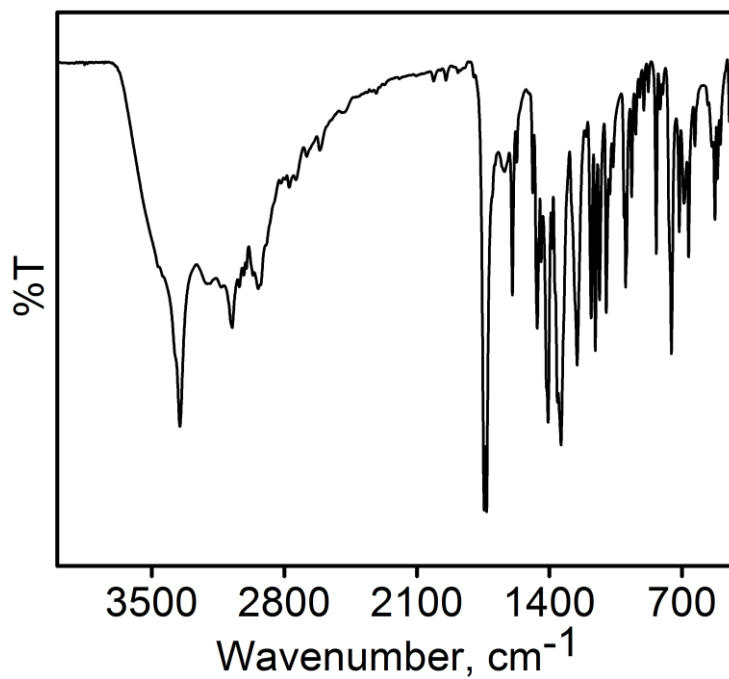

**Figure S26.** FTIR spectrum of ligand  $\text{H}_2\text{hbda}\cdot\text{HCl}$ .

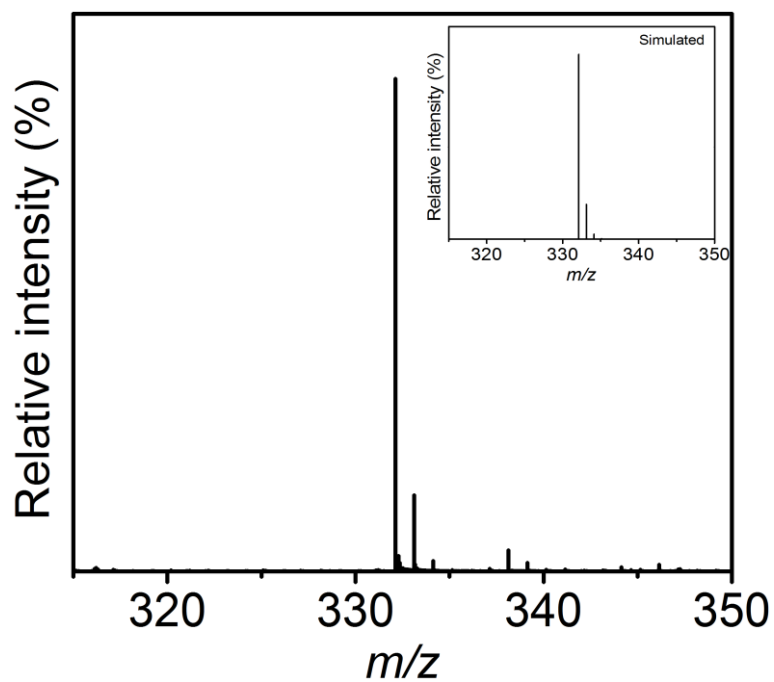

**Figure S27.** ESI-MS (+ve) mass spectrum of aqueous solution of ligand  $\text{H}_2\text{hbda}\cdot\text{HCl}$ . Simulated spectrum has been given as inset.

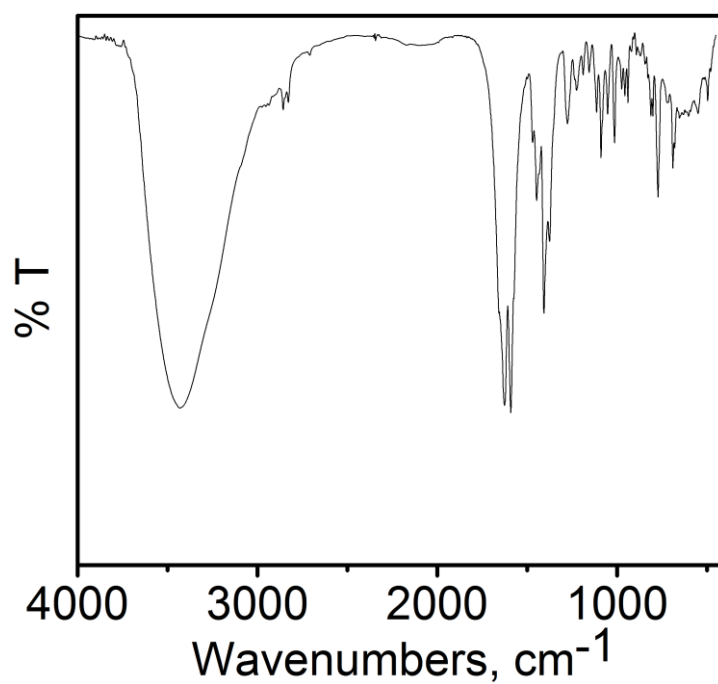

**Figure S28.** FTIR spectrum of complex **1**.



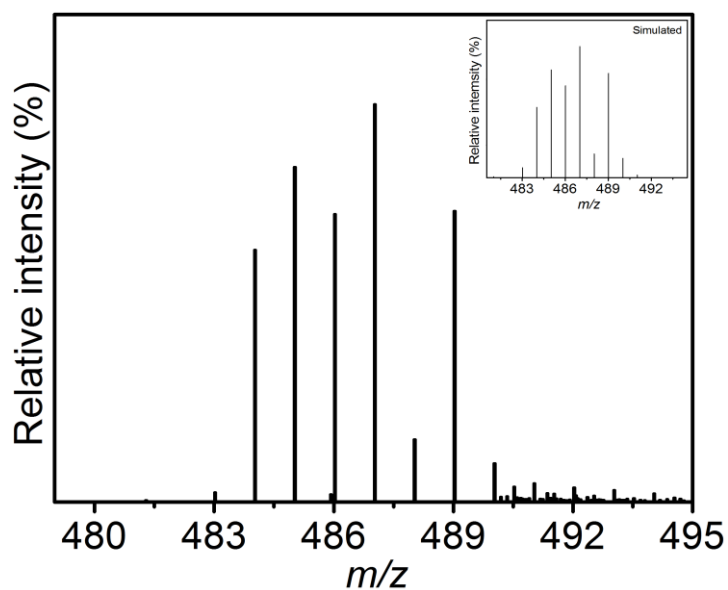

**Figure S29.** ESI-MS (+ve) mass spectrum of complex **1**. Simulated spectrum has been given as inset.

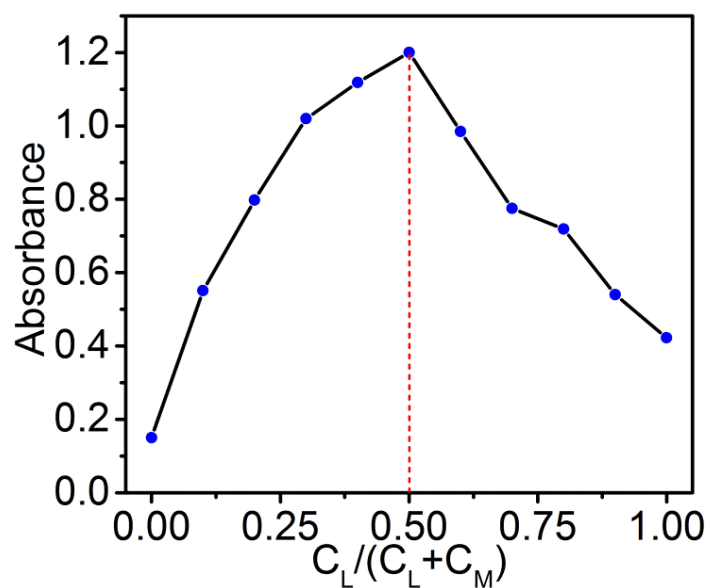

**Figure S30:** Job's plot for H<sub>2</sub>hbda and Gd(III) by measuring absorbance from UV-Vis spectra, recorded by varying proportion of H<sub>2</sub>hbda and Gd(III). [ligand] + [GdCl<sub>3</sub>•xH<sub>2</sub>O] = 0.5 mM, constant for all the solution. The dotted line corresponds to 1:1 stoichiometric ratio for complex **1** formation.

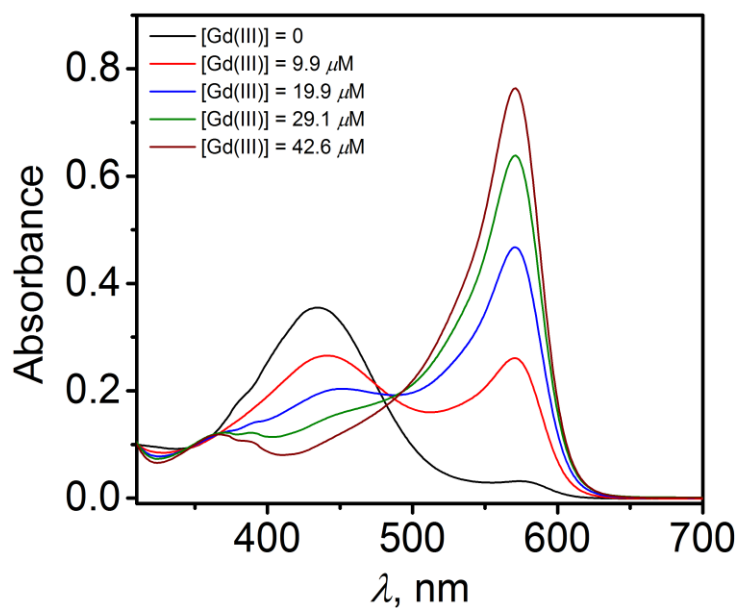

**Figure S31.** UV-Vis spectrum of xylenol orange solution in different concentrations of Gd(III) ion in acetate buffer at pH ~ 5.8.

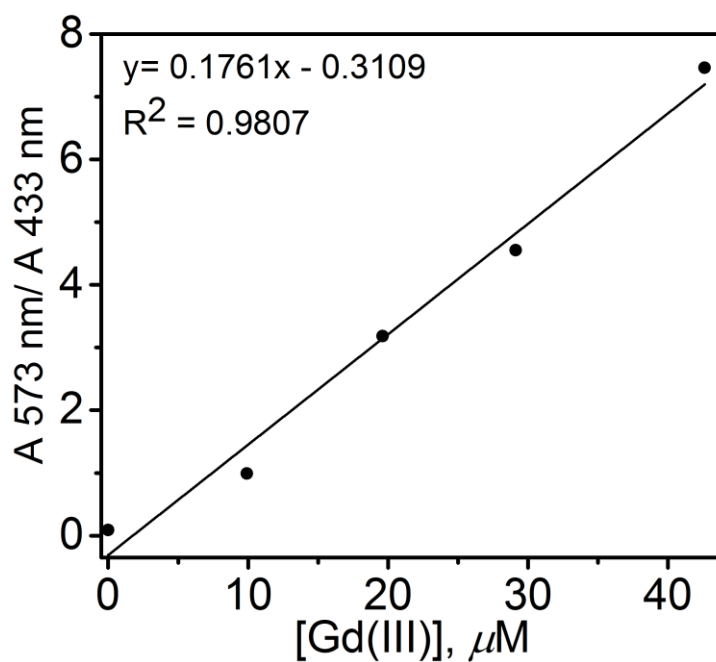

**Figure S32.** Calibration curve obtained from above observed changes in absorbances of xylenol orange in various concentrations of Gd(III) ions in acetate buffer at pH ~ 5.8. For 100  $\mu\text{L}$  of [complex **1**] = 12.45 mM in 2 mL of xylenol orange solution observed  $A_{573 \text{ nm}} / A_{433 \text{ nm}} = 0.23$ .

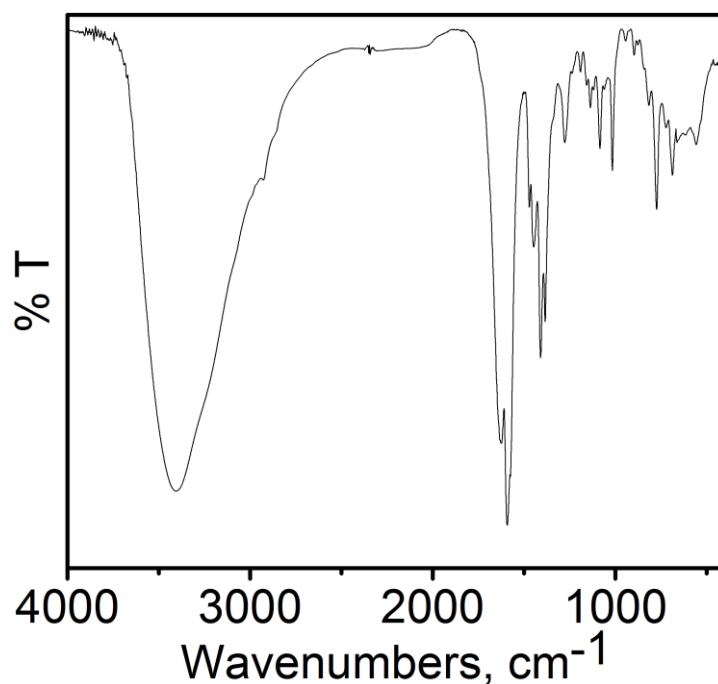

**Figure S33.** FTIR spectrum of complex **2**.

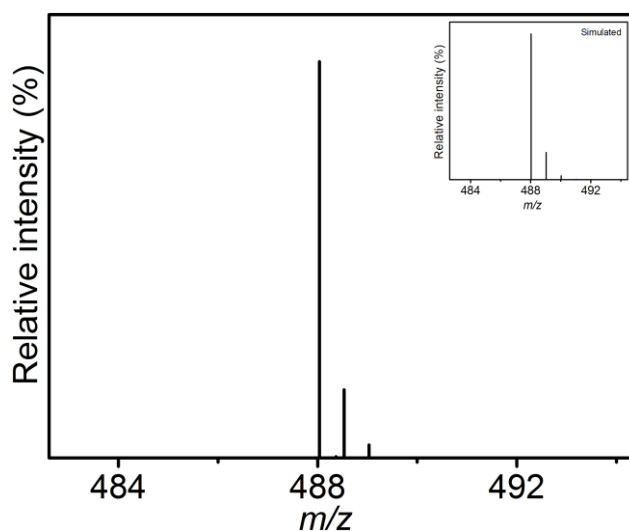

**Figure S34.** ESI-MS (+ve) mass spectrum of complex **2**. Simulated spectrum has been given as inset.

#### **Competition titration with DTPA:**

The general procedure used to determine the affinity of any ligand for Gd(III) ion is by competition titration. Throughout the titration, pH, concentrations of ligand H<sub>2</sub>hbda and Gd(III) ion were kept constant. Varying volumes of standardized H<sub>5</sub>DTPA stock solution were added to solutions containing constant concentration of ligand (H<sub>2</sub>hbda) and Gd(III) ion in constant electrolyte concentration. The pH of all solutions was maintained at 7.4 by preparing all

solutions in 10 mM HEPES buffer. All the solutions were kept for 48 hr to attain the thermodynamic equilibrium. The concentration of free and complexed ligand in each set of solution was determined from absorbance spectra considering a particular range of wavelength where spectral changes occurred. In that particular wave length range, variation of absorbance values for each solution set was calculated with respect to the absorbance of ligand H<sub>2</sub>hbda (in that wavelength range). Then, the concentrations of Gd<sub>2</sub>hbda complex, GdDTPA complex, free H<sub>2</sub>hbda and free H<sub>5</sub>DTPA for each set were calculated from the obtained values of variation of absorbances (calculated with respect to ligand absorbance). Then the logarithm values of respective ratios for GdDTPA to Gd<sub>2</sub>hbda complex concentrations against logarithm values of ratios free H<sub>5</sub>DTPA to free H<sub>2</sub>hbda concentrations we plotted for each set of samples. Then we obtained a linear plot. From the linear plot, pGd value for the ligand H<sub>2</sub>hbda was calculated as its x-intercept value based on the equation given below.

$$\log([GdDTPA]/[Gd_2hbda]) = \Delta pM + \log([H_5DTPA]/[H_2hbda])$$

#### **Number of Complexes per Nanoparticle:**

The average number of complexes confined within each nanoparticle was determined using the formula:<sup>1</sup>

$$N_1 = \frac{cVN_A}{\eta/m_{NP}} = \frac{cVN_A(\frac{1}{6}\pi\rho_{NP}d^3)}{\eta}$$

Where  $c$  = concentration in mother suspension,

$V$  = volume of mother suspension,

$N_A$  = Avogadro's number,

$\eta$  = yield from synthesis,

$m_{NP}$  = mass of nanoparticle,

$\rho_{NP}$  = density of nanoparticle (considered same as that of pure silica, 1.95 g cm<sup>-3</sup>),

$d$  = diameter of nanoparticle.

500  $\mu$ L of mother suspension was lyophilized for 24 h and 14 mg of dry silica were obtained. For Gd(III) concentration to be 0.088 mM and each nanoparticle sized 23.4 nm,  $n_{cplx} = 20$ .

### Computational Details:

The DFT calculations are performed using Gaussian16 package.<sup>2</sup> The initial geometries of the complexes were optimized at B97D3 level containing a pure functional, B97,<sup>3</sup> with the Grimme's D3BJ<sup>4</sup> dispersion (B97D3). Here, we have used correlation-consistent double-zeta (cc-pVDZ) basis sets developed by Dunning and coworkers<sup>5</sup> for the all the atoms except Gd. LANL2DZ (Los Alamos National Laboratory 2 Double-Zeta), ECP type basis set was used to model the metal atom.<sup>6</sup> The effect of water as solvent in the calculations was taken care through SCRF (self-consistent reaction field)<sup>7</sup> approach using CPCM<sup>8</sup> (polarizable conductor calculation model) formalism, as implemented in Gaussian16. Subsequent frequency analysis of the optimized geometries was performed to ensure the global minima in the potential energy surfaces for the system.

**Table S1.** Textural properties of blank SiO<sub>2</sub>NP and complex **1**@SiO<sub>2</sub>NP.

|                                       | BET surface area (m <sup>2</sup> /g) | Pore volume (cc/g) |
|---------------------------------------|--------------------------------------|--------------------|
| Blank SiO <sub>2</sub> NP             | 281.70                               | 1.65               |
| Complex <b>1</b> @SiO <sub>2</sub> NP | 269.61                               | 1.19               |

**Table S2.** Relaxivity data of complex **1**@SiO<sub>2</sub>NPs (per Gd), at 1.41 T, 25 °C, and pH ~ 7.4. Concentration of Gd(III) in the suspension determined by ICP-MS and bulk magnetic susceptibility (BMS) mechanism.

| Sets | <i>r</i> <sub>1</sub> (ICP-MS) | <i>r</i> <sub>1</sub> (BMS) |
|------|--------------------------------|-----------------------------|
| I.   | 94.27                          | 94.01                       |
| II.  | 95.72                          |                             |
| III. | 97.07                          |                             |

Hence, nanoparticles can be synthesized within ± 2% reproducibility limit.

To understand if the silica matrix had any contribution to relaxivity values, blank silica nanoparticles was prepared following same procedure with water as doping solution.

Synthesized nanoparticles was suspended in HEPES solution, pH ~ 7.4 and  $T_1$  and  $T_2$ , measured at 1.41 T, were 2970 ms and 2986 ms respectively which is same as that of water.

**Table S3:** Relaxivity of some Gd-based contrast agents.

| Gd-based Contrast agents                                                  | $q$  | $r_1$ ( $\text{mM}^{-1}\text{s}^{-1}$ ), at pH 7.4             | Ref. No. in SI |
|---------------------------------------------------------------------------|------|----------------------------------------------------------------|----------------|
| Complex 1                                                                 | 3    | 9.82, at 25 °C, 1.41 T<br>9.05, at 37 °C, 1.41 T               | This work      |
| [Gd(cbda)(OH <sub>2</sub> ) <sub>3</sub> ]                                | 3    | 10.95, at 25 °C, 1.41 T                                        | 9              |
| Gd(dpaa)(H <sub>2</sub> O) <sub>3</sub>                                   | 3    | 9.4, at 25 °C, 1.06 T                                          | 10             |
| [Gd(dhqN-SO <sub>3</sub> )(H <sub>2</sub> O) <sub>3</sub> ] <sup>3-</sup> | 3    | 9.25, at 37 °C, 1.2 T                                          | 11             |
| Gd(edta)(H <sub>2</sub> O) <sub>3</sub> <sup>-</sup>                      | 3    | 7.15, at 25 °C, 0.47 T                                         | 12             |
| Complex 1@SiO <sub>2</sub> NP                                             | 3    | 86.41, at 37 °C, 1.41 T<br>95.3, at 25 °C, 1.41 T              | This work      |
| [Gd(TCAS)]- SN-III                                                        | —    | 46.49, at 37 °C, 1.41 T<br>50.91, at 25 °C, in presence of BSA | 13             |
| MSN-Gd                                                                    | 2    | 28.8, at 3 T                                                   | 14             |
| PSS-Na[Gd·2]                                                              | 2.65 | 12.41, at 25 °C, 0.47 T                                        | 15             |
| Si25NPs                                                                   | 3    | 77, at 37 °C, 1.2 T                                            | 11             |
| GdDOTA <sub>C</sub> NPs                                                   | 1    | 72.3, at 37 °C, 1.41 T                                         | 16             |
| FSb-EuGd                                                                  | —    | 38.8 at 25 °C, 9.4 T                                           | 17             |
| Gd <sub>2</sub> O <sub>3</sub> @MSN                                       | —    | 45.08 at 0.5 T                                                 | 18             |
| Gd@SiO <sub>2</sub> -PEG500                                               | —    | 18.5, at 40 °C, 1.41 T                                         | 19             |
| Gd <sup>3+</sup> -incorporated MSN                                        | —    | 51.85 at 0.5 T                                                 | 20             |

**Table S4.** DLS hydrodynamic diameters and zeta potentials of complex **1**@SiO<sub>2</sub>NPs in absence and presence of BSA, at pH ~ 7.4.

| <b>Particles</b>                                     | <b>Hydrodynamic diameter (nm)</b> | <b>PdI</b> | <b>Zeta Potential (mV)</b> |
|------------------------------------------------------|-----------------------------------|------------|----------------------------|
| Complex <b>1</b> @SiO <sub>2</sub>                   | 295.6                             | 0.365      | -19.0                      |
| Complex <b>1</b> @SiO <sub>2</sub> + 4.5 % BSA (w/v) | 372.0                             | 0.471      | -24.6                      |

**Table S5.** DLS hydrodynamic diameters, FE-TEM particle size and longitudinal relaxivity values of bare silica nanoparticles, complex **1**@SiO<sub>2</sub>NPs in the absence and the presence of BSA, and in different pH solutions.

| <b>Material</b>                                         | <b>Hydrodynamic diameter (nm)</b> | <b>PdI</b> | <b>Particle Size (nm)</b>                                                | <b><math>r_1</math> (mM<sup>-1</sup>s<sup>-1</sup>) at 37 °C,<br/>pH ~ 7.4, 1.41 T</b> |
|---------------------------------------------------------|-----------------------------------|------------|--------------------------------------------------------------------------|----------------------------------------------------------------------------------------|
| SiO <sub>2</sub> NP                                     | 284.1                             | 0.256      | 22.0                                                                     | —                                                                                      |
| Complex <b>1</b> @SiO <sub>2</sub>                      | 295.6                             | 0.365      | 23.4                                                                     | 86.41                                                                                  |
| Complex <b>1</b> @SiO <sub>2</sub> + 4.5 % BSA (w/v)    | 372.0                             | 0.471      | 24.4                                                                     | 118.32                                                                                 |
| <b>Complex <b>1</b>@SiO<sub>2</sub> at different pH</b> | <b>Hydrodynamic diameter (nm)</b> | <b>PdI</b> | <b><math>r_1</math> (mM<sup>-1</sup>s<sup>-1</sup>) at 25 °C, 1.41 T</b> |                                                                                        |
| <b>4.02</b>                                             | 307.6                             | 0.327      | 95.81                                                                    |                                                                                        |
| <b>5.18</b>                                             | 303.0                             | 0.312      | 95.97                                                                    |                                                                                        |
| <b>6.08</b>                                             | 298.3                             | 0.276      | 95.61                                                                    |                                                                                        |
| <b>7.40</b>                                             | 295.6                             | 0.365      | 95.32                                                                    |                                                                                        |
| <b>8.29</b>                                             | 301.1                             | 0.302      | 95.44                                                                    |                                                                                        |

**Table S6:** Optimized coordinates of the complex **1** at B97D3 level of theory. (in xyz format)

C -4.040000e+00 7.000000e-01 -3.385000e+00  
C -3.168000e+00 2.500000e-01 -2.450000e+00  
N -2.222000e+00 1.037000e+00 -2.010000e+00  
C -2.168000e+00 2.292000e+00 -2.234000e+00  
C -2.963000e+00 2.861000e+00 -3.171000e+00  
C -3.927000e+00 2.044000e+00 -3.797000e+00  
C -3.186000e+00 -1.154000e+00 -1.807000e+00  
O -2.285000e+00 -1.405000e+00 -9.280000e-01  
O -4.052000e+00 -2.011000e+00 -2.123000e+00  
C -1.171000e+00 3.022000e+00 -1.318000e+00  
N -1.181000e+00 2.191000e+00 -9.700000e-02  
C -3.430000e-01 2.728000e+00 9.930000e-01  
C 1.094000e+00 2.241000e+00 8.440000e-01  
N 1.192000e+00 1.049000e+00 3.880000e-01  
C 2.272000e+00 3.230000e-01 5.450000e-01  
C 3.445000e+00 8.890000e-01 9.300000e-01  
C 3.455000e+00 2.263000e+00 1.239000e+00  
C 2.233000e+00 2.956000e+00 1.222000e+00  
C 2.064000e+00 -1.174000e+00 2.780000e-01  
O 2.994000e+00 -2.007000e+00 4.390000e-01  
O 9.030000e-01 -1.536000e+00 -1.070000e-01  
C -2.501000e+00 2.025000e+00 4.160000e-01  
Gd -5.700000e-01 9.500000e-02 -7.420000e-01



O 8.750000e-01 9.960000e-01 -2.243000e+00  
O 2.766000e+00 2.593000e+00 -2.029000e+00  
O -2.740000e-01 -1.359000e+00 -2.460000e+00  
C -2.357000e+00 1.035000e+00 1.613000e+00  
O -1.602000e+00 -5.200000e-02 1.306000e+00  
H -4.790000e+00 5.700000e-02 -3.796000e+00  
H -2.867000e+00 3.897000e+00 -3.424000e+00  
H -4.564000e+00 2.437000e+00 -4.561000e+00  
H -1.940000e-01 3.068000e+00 -1.752000e+00  
H -1.498000e+00 4.020000e+00 -1.113000e+00  
H -6.780000e-01 2.323000e+00 1.925000e+00  
H -4.280000e-01 3.795000e+00 1.013000e+00  
H 4.339000e+00 3.060000e-01 9.970000e-01  
H 4.367000e+00 2.763000e+00 1.490000e+00  
H 2.176000e+00 3.988000e+00 1.498000e+00  
H -3.116000e+00 1.597000e+00 -3.480000e-01  
H -2.936000e+00 2.950000e+00 7.330000e-01  
H 3.810000e-01 1.382000e+00 -2.971000e+00  
H 1.398000e+00 1.678000e+00 -1.815000e+00  
H 3.511000e+00 2.143000e+00 -1.623000e+00  
H 2.581000e+00 3.403000e+00 -1.548000e+00  
H -7.200000e-02 -2.230000e+00 -2.111000e+00  
H -1.077000e+00 -1.402000e+00 -2.985000e+00  
H -1.869000e+00 1.535000e+00 2.424000e+00

H -3.338000e+00 7.290000e-01 1.910000e+00  
O -1.259000e+00 -1.851000e+00 -4.885000e+00  
H -1.825000e+00 -2.599000e+00 -4.680000e+00  
H -4.030000e-01 -2.170000e+00 -5.181000e+00  
O -2.780000e-01 -3.163000e+00 -1.518000e+00  
H 5.560000e-01 -3.165000e+00 -1.042000e+00  
H -9.900000e-01 -2.939000e+00 -9.140000e-01  
O 1.771000e+00 1.429000e+00 -4.499000e+00  
H 1.287000e+00 1.914000e+00 -5.170000e+00  
H 2.430000e+00 2.003000e+00 -4.101000e+00  
H -2.157000e+00 -8.350000e-01 1.323000e+00

## REFERENCES:

1. S. V. Eliseeva, B. Song, C. D. B. Vandevyver, A. -S. Chauvin, J. B. Wacker and J. C. G. Bunzli, *New. J. Chem.*, 2010, **34**, 2915-2921.
2. M. J. Frisch, G. W. Trucks, H. B. Schlegel, G. E. Scuseria, M. A. Robb, J. R. Cheeseman, G. Scalmani, V. Barone, B. Mennucci, G. A. Petersson, H. Nakatsuji, M. Caricato, X. Li, H. P. Hratchian, A. F. Izmaylov, J. Bloino, G. Zheng, J. L. Sonnenberg, M. Hada, M. Ehara, K. Toyota, R. Fukuda, J. Hasegawa, M. Ishida, T. Nakajima, Y. Honda, O. Kitao, H. Nakai, T. Vreven, J. A., Jr. Montgomery, J. E. Peralta, F. Ogliaro, M. Bearpark, J. J. Heyd, E. Brothers, K. N. Kudin, V. N. Staroverov, R. Kobayashi, J. Normand, K. Raghavachari, A. Rendell, J. C. Burant, S. S. Iyengar, J. Tomasi, M. Cossi, N. Rega, J. M. Millam, M. Klene, J. E. Knox, J. B. Cross, V. Bakken, C. Adamo, J. Jaramillo, R. Gomperts, R. E. Stratmann, O. Yazyev, A. J. Austin, R. Cammi, C. Pomelli, J. W. Ochterski, R. L. Martin, K. Morokuma, V. G. Zakrzewski, G. A. Voth, P. Salvador, J. J. Dannenberg, S. Dapprich, A. D. Daniels, O. Farkas, J. B. Foresman, J. V. Ortiz, J. Cioslowski and D. J. Fox, *Gaussian 09*, Revision D.01; Gaussian, Inc.: Wallingford, CT, 2015.
3. A. D. Becke, Density-functional thermochemistry. V. *J. Chem. Phys.* 1997, **107**, 8554-8560.

4. S. Grimme, S. Ehrlich and L. Goerick, *J. Comput. Chem.* 2011, **32**, 1456-1465.
5. T. H. Dunning, *J. Chem. Phys.* 1989, **90**, 1007-1023.
6. P. J. Hay and W. R. J. Wadt, *Chem. Phys.* 1985, **82**, 299.
7. S. Meirtuš, E. Scorocco and J. Tomasi, *Chem. Phys.* 1981, **55**, 117-129.
8. V. Barone and M. Cossi, *J. Phys. Chem. A* 1998, **102**, 1995-2001.
9. M. Khannam, S. K. Sahoo and C. Mukherjee, *Eur. J. Inorg. Chem.*, 2019, 2518–2523.
10. A. M. Nonat, C. Gateau, P. H. Fries, L. Helm and M. Mazzanti, *Eur. J. Inorg. Chem.*, 2012, 2049-206.
11. M. M. Karimdjy, G. Tallec, P. H. Fries, D. Imbert and M. Mazzanti, *Chem. Commun.* 2015, **51**, 6836-6838.
12. A. C. Chang, H. G. Brittain, J. Telser and M. W. Tweedle, *Inorg. Chem.* 1990, **29**, 4468–4473.
13. S. V. Fedorenko, S. L. Grechkina, A. R. Mustafina, K. V. Kholin, A. S. Stepanov, I. R. Nizameev, I. E. Ismaev, M. K. Kadirov, R. R. Zairov, A. N. Fattakhova, R. R. Amirov and S. E. Soloveva, *Colloids Surf. B: Biointerfaces* 2017, **149**, 243-249.
14. M. L. T. Kathryn, J. S. Kim, W. J. Rieter, H. An, W. Lin and W. Lin, *J. Am. Chem. Soc.* 2008, **130**, 2154-2155.
15. R. Zairov, G. Khakimullina, S. Podyachev, I. Nizameev, G. Safiullin, R. Amirov. A. Vomiero and A. Mustafina, *Sci. Rep.*, 2017, **7**, 14010.
16. T. Courant, V. G. Roullin, C. Cadiou, M. Callewaert, M. C. Andry, C. Portefaix, C. Hoeffel, M. C. de Goltstein, M. Port, S. Laurent, L.V. Elst, R. Muller, M. Molinari and F. Chuburu, *Angew. Chem. Int. Ed.* 2012, **51**, 9119-9122.
17. S. L. C. Pinho, J. Sereno, A. J. Abrunhosa, M. H. Delville, J. Rocha, L. D. Carlos and C. F. G. C. Geraldes, *Inorg. Chem.* 2019, **58**, 16618–16628.
18. K. Ni, Z. Zhao, Z. Zhang, Z. Zhou, L. Yang, L. Wang, H. Ai and J. Gao, *Nanoscale* 2016, **8**, 3768–3774.

19. W. I. Lin, C. Y. Lin, Y. S. Lin, S. H. Wu, Y. R. Huang, Y. Hung, C. Chang and C. Y. Mou, *J. Mater. Chem. B* 2013, **1**, 639-645.

20. Z. Li, J. Guo, M. Zhang, G. Li and L. Hao, *Front. Chem.* 2022, **10**, 837032.
